# Reduced Cortical Excitability is Associated with Cognitive Symptoms in Concussed Adolescent Football Players

Kevin C. Yu<sup>1</sup>, Alex I. Wiesman<sup>2,3\*</sup>, Elizabeth Davenport<sup>4</sup>, Laura A. Flashman<sup>5</sup>, Jillian Urban<sup>6</sup>, Srikantan S. Nagarajan<sup>7</sup>, Kiran Solingpuram Sai<sup>8</sup>, Joel Stitzel<sup>6</sup>, Joseph A. Maldjian<sup>4</sup>, Christopher T. Whitlow<sup>1,6,8,9,10\*</sup>

1. Radiology Informatics and Image Processing Laboratory, Wake Forest School of Medicine, Winston-Salem, North Carolina
2. Department of Biomedical Physiology & Kinesiology, Simon Fraser University, Burnaby, British Columbia, Canada
3. McConnell Brain Imaging Centre, Montreal Neurological Institute, McGill University, Montreal, Canada
4. Department of Radiology, University of Texas Southwestern Medical Center, Dallas, Texas
5. Department of Neuropsychology & Psychology, Wake Forest School of Medicine, Winston-Salem, North Carolina
6. Department of Biomedical Engineering, Wake Forest School of Medicine, Winston-Salem, North Carolina
7. Department of Radiology and Biomedical Imaging, University of California San Francisco, San Francisco, California
8. Department of Radiology, Wake Forest School of Medicine, Winston-Salem, North Carolina
9. Department of Biostatistics and Data Science, Wake Forest School of Medicine, Winston-Salem, North Carolina
10. Clinical and Translational Science Institute, Wake Forest School of Medicine, Winston-Salem, North Carolina

\* Corresponding author

Kevin C. Yu and Alex I. Wiesman are equal contributors to this work and designated as co-first authors.

## Correspondence:

Alex I. Wiesman, PhD  
Department of Biomedical Physiology & Kinesiology  
Simon Fraser University, Burnaby, British Columbia  
[awiesman@sfu.ca](mailto:awiesman@sfu.ca)

Christopher T. Whitlow, MD, PhD, MHA  
Department of Radiology  
Wake Forest School of Medicine, Winston-Salem, North Carolina  
[cwhitlow@wakehealth.edu](mailto:cwhitlow@wakehealth.edu)

---

## **Key Results:**

1. Concussion reduces cortical excitability in superior frontal cortices.
2. This reduction accounts for canonical effects of concussion on delta and gamma power.
3. Concussion-related changes in cortical excitability are associated with increased cognitive symptom severity.

## Abstract

1 **Background:** American tackle football is associated with high rates of concussion, leading to  
2 neurophysiological disturbances and debilitating clinical symptoms. Previous investigations of the  
3 neurophysiological effects of concussion have largely ignored aperiodic neurophysiological  
4 activity, which is a marker of cortical excitability.

5 **Purpose:** We examined whether concussion during a season of high school football is related to  
6 changes in aperiodic and periodic neurophysiological activity and whether any such changes are  
7 associated with clinical outcomes.

8 **Materials and Methods:** Pre- and post-season resting-state magnetoencephalography (MEG)  
9 data were collected from 91 high school football players over as many as four seasons of play,  
10 for a total of 278 data collections. During these seasons of football play, a cohort of 10 individuals  
11 were diagnosed with concussion. MEG data were source-imaged, frequency-transformed and  
12 parameterized, and linear mixed models were used to examine effects of concussion on pre-to-  
13 post-season changes in neurophysiological activity. Scores on the Post-Concussive Symptom  
14 Inventory were correlated with pre-to-post-season neurophysiological changes to determine their  
15 clinical relevance.

16 **Results:** Concussion was associated with increased aperiodic exponents in superior frontal  
17 cortices, indicating a relative reduction in cortical excitability. This slowing of aperiodic  
18 neurophysiology mediated concussion effects on raw delta and gamma power and was  
19 associated with worse cognitive concerns across participants. Pre-to-post-season changes in  
20 aperiodic-corrected alpha and theta rhythmic activity were also decreased in posterior cortices in  
21 concussed players.

22 **Conclusion:** These findings indicate that concussion alters both the excitability and rhythmic  
23 signaling of the cortex, with differing spatial topographies and implications for clinical symptoms.

## 1 Introduction

2 Among youth sports played in the United States, tackle football is associated with the greatest  
3 number of concussions, with between 1.1 and 1.9 million detected annually in players 18 years  
4 old and younger.<sup>1,2</sup> Concussions, also known as mild traumatic brain injuries (mTBI), cause  
5 axonal injury and disturbances in brain function, resulting in debilitating clinical sequelae both  
6 acutely and chronically.<sup>2-4</sup> The adolescent developing brain is especially susceptible to  
7 concussions, resulting in profound neurostructural and neurophysiological changes at the  
8 macro-scale.<sup>3,5-10</sup>

9 Magnetoencephalography (MEG) can non-invasively detect these neurophysiological changes  
10 with millisecond time resolution,<sup>11,12</sup> and has potential value as a clinical tool for concussion  
11 diagnosis and prognosis<sup>5,13,14</sup>. Previous examinations of mTBIs resulting from both football- and  
12 military-related impacts with MEG have shown abnormal changes in frequency-defined  
13 neurophysiological activity, manifesting most notably as alterations in delta (1 – 4 Hz) and  
14 gamma (30 – 80 Hz) activities, which are related to the severity of cognitive impairments.<sup>5,10,13</sup>  
15 Concussion-related increases in slow-frequency activity in particular mirror similar pathological  
16 increases in patient with Parkinson's<sup>15-18</sup> and Alzheimer's<sup>19-24</sup> diseases, which are related to the  
17 hallmark proteinopathy and clinical impairments of each disorder.

18 With few exceptions<sup>14,25</sup>, previous M/EEG studies of concussion have used traditional  
19 approaches to spectral power analysis – exploring neurophysiological activity within canonical  
20 frequency bands while ignoring the aperiodic (i.e., arrhythmic) component. However, recent  
21 research has shown that aperiodic neurophysiological activity, and particularly its negative-  
22 signed slope (typically quantified as a positively-signed exponent), has substantial implications  
23 for understanding human brain function in states of health and disease<sup>18,26-36</sup>. The aperiodic  
24 slope of the neural signal flattens with healthy aging<sup>29,33</sup> and development<sup>37-40</sup>, and is slowed

1 (i.e., steepens) in several neurological disorders such as Parkinson’s disease<sup>18,41,42</sup>,  
2 epilepsy<sup>43,44</sup>, and stroke<sup>35</sup>. Moreover, ignoring aperiodic activity as a source of “noise” runs the  
3 risk of conflating alterations in aperiodic neurophysiology with those in periodic neuronal  
4 oscillations<sup>29,45</sup>, thereby reducing sensitivity and interpretational clarity.

5 Investigations of the aperiodic slope in human neurophysiology have indicated its potential utility  
6 as a proxy of general cortical excitability. A previous EEG study of sleep and general anesthesia  
7 in adults demonstrated that the aperiodic slope can reliably track fast changes in cortical  
8 excitability across states of wakefulness, NREM, and REM sleep – specifically reporting  
9 steepening of the spectral slope during REM and propofol administration<sup>27</sup>, both of which are  
10 known to increase inhibition. Furthermore, an MEG study of generalized epilepsy showed that  
11 flattening of the aperiodic slope indexed whole brain hyperexcitability, even in the absence of  
12 interictal epileptic discharges<sup>46</sup>. These findings are also supported by computational modeling of  
13 the biophysical bases of human aperiodic neurophysiology<sup>47</sup>, and together indicate that steeper  
14 aperiodic slopes (i.e., higher exponents) are associated with decreased excitability and/or  
15 increased inhibition in cortical circuits.

16 One recent MEG study<sup>14</sup> used spectral parameterization to determine the effect of mTBI on  
17 periodic neurophysiological activity. The authors found a reduction of beta-frequency periodic  
18 activity in participants with a mTBI but did not explicitly test whether aperiodic activity also differed  
19 significantly between the mTBI and control groups. An EEG study of adults with mTBI also  
20 examined parameterized power spectra, and found significant group differences in the peak  
21 frequency of alpha periodic activity within frontoparietal regions, but no differences in aperiodic  
22 neurophysiological activity.<sup>25</sup> However, this study did not include participants in adolescence,  
23 which is a period of rapid neurodevelopmental change, especially within frontal lobe regions<sup>48</sup> that  
24 are susceptible to head impacts.<sup>49,50</sup> Further, neither of these studies measured  
25 neurophysiological activity prior to the mTBI event, potentially limiting their statistical sensitivity.

1 In this study, we examined whether the occurrence of a concussion during a season of football  
2 play is related to altered cortical excitability from pre- to post-season, as indexed by changes in  
3 aperiodic neurophysiological activity, and whether any such changes are associated with clinical  
4 outcomes. We hypothesized that concussion would be associated with pathologic slowing of  
5 aperiodic neurophysiologic activity, indexed by a more positive exponent and indicating a  
6 reduction in cortical excitability, and that these changes would relate to clinical symptomatology.  
7 We also expected that previously reported alterations in delta- and gamma-frequency  
8 neurophysiological activity in concussed individuals may actually be attributable to this aperiodic  
9 slowing effect. Finally, we anticipated to replicate periodic activity decreases in the alpha and  
10 beta frequency bands.

## Materials & Methods

### 1 *Participants*

2 This study was reviewed and approved by the Wake Forest School of Medicine Institutional  
3 Review Board. Each participant and their parent provided assent and written informed consent,  
4 respectively, following detailed description of the study. All protocols complied with the  
5 Declaration of Helsinki. Exclusion criteria based on medical history questionnaire consisted of  
6 past neurological illness or major psychiatric disease, developmental disorders, medications that  
7 alter neurophysiology, concussion occurrence in the preceding year, or any contraindications to  
8 MRI or MEG scans (e.g., non-removable ferromagnetic implants).

9 High school football players in Winston-Salem, North Carolina were recruited as part of the  
10 imaging Telemetry and Kinematic modeLing (iTAKL) study<sup>5,51</sup>, which follows varsity and junior  
11 varsity football players throughout their season(s) of play to study the effects of impact exposure  
12 on the brain. Of the football players recruited from the 2012 to 2019 seasons, ninety-one players  
13 had complete and useable MEG data at both pre- and post- time points for at least one season  
14 (all male; mean age = 16.35), with 57 providing useable data for one season (mean age = 16.43),  
15 22 for two seasons (mean age = 16.33), 10 for three seasons (mean age = 15.88), and two for  
16 four seasons (mean age = 16.75). This resulted in 139 seasons of repeated measures data across  
17 91 individuals, for a total of 278 pre- and post-season neuroimaging data collection time points.  
18 Over the course of all seasons, 10 of these players were diagnosed with a concussion during the  
19 season of play (mean age = 15.99). Concussions were identified by a certified athletic trainer who  
20 attended all games and team practices. Players with possible concussions were referred to our  
21 collaborating concussion clinic for further evaluation and diagnosis by a Sports Medicine  
22 physician, where the Post Concussion Symptom Inventory (PCSI)<sup>52</sup> was administered. The

1 football players also underwent preseason and postseason T1 MRI scans for anatomical co-  
2 registration of their MEG data.

3  
4  
5  
6  
7  
8  
9  
10

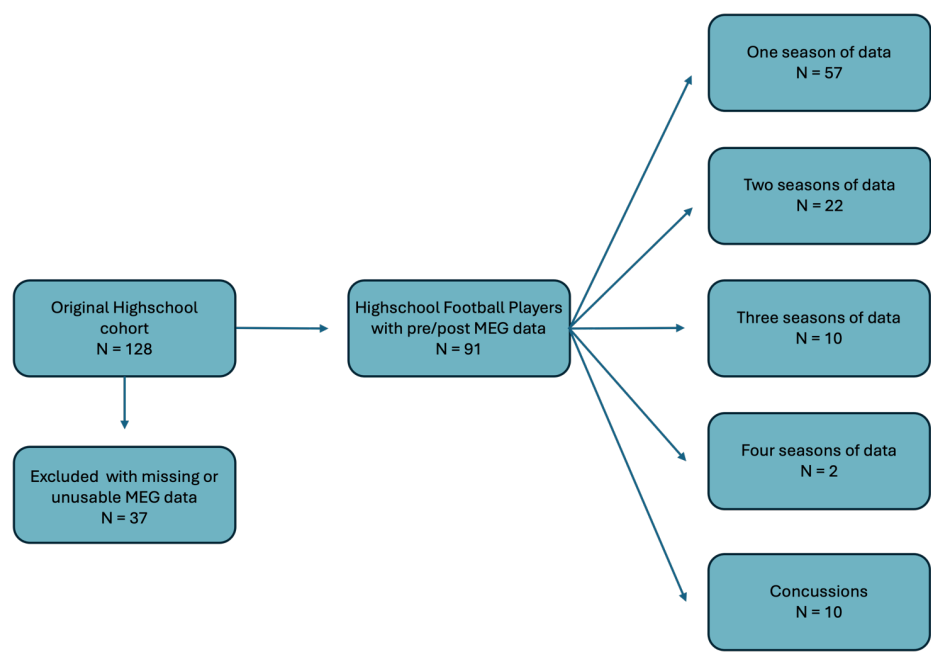

11 **Figure 1. Participant Flowchart**

12

### 13 *MRI Acquisition and Processing*

14 Participants underwent MRI scans on a 3T Siemens Skyra MRI scanner with a 32 channel, high-  
15 resolution head/neck coil (Siemens Medical, Malvern, PA). T1-weighted anatomical MRI were  
16 obtained via a 3D volumetric magnetization prepared rapid gradient echo (MPRAGE) sequence  
17 with 0.9 mm isotropic resolution (TR = 1900, TI = 900, TE = 2.93, FA = 9 degrees, 176 slices).  
18 Fiducial markers were placed on the nasion and bilateral preauricular regions prior to MRI for co-  
19 registration with participant MEG data. Participant anatomical MRIs were segmented and  
20 parcellated using *Freesurfer recon-all*<sup>63</sup> with default settings.

## 1 *Magnetoencephalography Data Collection and Analyses*

2 Eight minutes of eyes-open resting-state MEG data<sup>54</sup> were collected using a 275-channel axial  
3 gradiometer CTF Omega 2005 system (VSM MedTech Ltd., Coquitlam, Canada) at a sampling  
4 rate of 1200 Hz with participants sitting in an upright position and fixating on a central point.  
5 Participants were monitored via real-time audio-video feeds during data acquisition. MEG data  
6 was processed using *Brainstorm*.<sup>55</sup> The MEG data were resampled to 250 Hz, band passed  
7 filtered between 0.5-100 Hz, and notch filtered at 60 Hz (and harmonics). Bad data segments  
8 were identified and rejected manually. Independent component analysis (ICA) was used to detect  
9 and remove artifacts, including heartbeats, eyeblinks, and muscle artifacts based on their  
10 temporal and spatial topographies. The MEG data were coregistered with each subject's  
11 individual structural MRI.<sup>56</sup> The coregistered data were then source localized using a linearly  
12 constrained minimum variance (LCMV) beamformer implemented in *Brainstorm* with default  
13 settings, with source orientations unconstrained to the cortical surface. Welch's method (window  
14 = 6s; 50% overlap) was used to transform the source-level time series data into the frequency  
15 domain. These data were parameterized using *specparam*<sup>29</sup> (*Brainstorm* MATLAB version;  
16 frequency range = 1-40 Hz; Gaussian peak model; peak width limits = 0.5-12 Hz; maximum n  
17 peaks = 3; minimum peak height = 3 dB; proximity threshold = 2 standard deviations of the largest  
18 peak; fixed aperiodic; no guess weight). To represent the aperiodic components of the  
19 neurophysiological power spectrum, the offset and slope of the arrhythmic model fit were  
20 extracted per vertex. We also re-computed the parameterization of these spectra, excluding the  
21 lower frequencies (new frequency range = 10 – 40 Hz), to ensure that the aperiodic offset and/or  
22 legitimate periodic delta-frequency activity did not bias our estimation of the aperiodic exponent.  
23 The aperiodic spectra were then subtracted from the original Welch's PSDs to derive the rhythmic  
24 (i.e., aperiodic-corrected) spectra.

25



1 The rhythmic and arrhythmic neurophysiological features were subsequently averaged over the  
2 vertices per each region of the Desikan-Killiany atlas<sup>57</sup>, and the rhythmic spectral data were  
3 averaged over canonical frequency bands (delta: 2 - 4 Hz, theta: 5 - 7 Hz, alpha: 8 - 12 Hz, beta:  
4 15 - 29 Hz). This resulted in six maps of neurophysiological activity for each season and  
5 participant: the rhythmic activity in each of the four canonical frequency bands and the arrhythmic  
6 activity represented by the aperiodic exponent (i.e., slope) and offset. As indicated above, we also  
7 generated an additional map per each season and participant of the high-frequency aperiodic  
8 exponent. For each of these features, the pre-season brain maps were subtracted from the post-  
9 season maps to generate maps of change in neurophysiological activity per each season and  
10 participant. Band-averaged maps of the un-parameterized spectral data (delta: 2 - 4 Hz, theta: 5  
11 - 7 Hz, alpha: 8 - 12 Hz, beta: 15 - 29 Hz, gamma: 30 – 59 Hz) were also generated using a similar  
12 approach, to determine the influence of parameterization on previously reported  
13 neurophysiological changes.

14

### 15 *Post-Concussive Symptom Inventory*

16 The Post-Concussive Symptom Inventory (PCSI) is a 21-item questionnaire that is used to  
17 discriminate between athletes with and without concussion by quantifying symptom severity on a  
18 scale of 0-6. Parental PCSI data were collected for each participant with diagnosed concussions  
19 at time of evaluation. Items on the questionnaire are grouped into physical, emotional, and  
20 cognitive symptom clusters.<sup>52,58</sup> We focused our hypotheses on the cognitive symptom cluster of  
21 the PCSI, which includes: feeling mentally “foggy”, difficulty concentrating, difficulty remembering,  
22 getting confused with directions or tasks, answering questions more slowly than usual, and feeling  
23 slowed down.<sup>52,58</sup>

24

## 1 *Statistics*

2 A linear mixed-effects modeling approach was implemented to test the relationship between the  
3 occurrence of concussion and post-to-pre-season neurophysiological changes using the *lme4*  
4 package<sup>59</sup> in *R*. Note that a major benefit of this approach is that it allows for the nesting of multiple  
5 repeated-measures (i.e., seasons) within each participant, while still utilizing all of the available  
6 data. Concussion occurrence was modeled as a categorical variable (i.e., concussion versus no-  
7 concussion in a given season), and age at pre-season scan, time between pre-season and post-  
8 season scans, and body mass index (BMI) were included as nuisance covariates. The final model  
9 took the following form:

10 *neurophysiological change* ~ *concussion* + *preseason age* + *time between scans* + *BMI* +  
11 *(1|participant)*

12 For each neurophysiological feature of interest, this model was fit per each region of the Desikan-  
13 Killiany atlas and the resulting p-values associated with the effect of concussion were corrected  
14 across regions via the Benjamini-Hochberg method<sup>60</sup>. Neurophysiological data were averaged  
15 over atlas regions that exhibited significant effects (with the same sign) for subsequent data  
16 visualization and mediation modeling (see below). Based on previous literature<sup>5,10,61–64</sup> and our  
17 own hypotheses, we initially focused our hypotheses on the maps of delta (both corrected and  
18 uncorrected for the aperiodic spectra) and gamma (aperiodic-uncorrected only, as  
19 parameterization above ~ 40 Hz is not advised<sup>29</sup>) activity, as well as the aperiodic features (i.e.,  
20 slope and offset). All models were re-computed using an outlier exclusion threshold of normalized  
21 residuals  $\geq$  the 97.5 percentile to confirm that our results were not influenced by outliers, and only  
22 results that survived this procedure are reported.

23 To examine associations between neurophysiological changes in concussion-sensitive brain  
24 regions and cognition, we averaged the post-to-pre-season changes in neurophysiological activity

1 over brain regions where a significant effect of concussion was observed and correlated these  
2 values with the cognitive domain score of the PCSI. Non-parametric permutation testing was also  
3 used to partially account for the biases introduced by small sample sizes in cross-sectional  
4 correlation analyses using the *Imp* function in *R* (method = "Exact").

5 Where appropriate, causal mediation analysis was used to test for indirect effects using a non-  
6 parametric bootstrapping approach with 10,000 simulations<sup>65</sup> on region-averaged  
7 neurophysiological features.

## 1 **Results**

### 2 *Aperiodic Neurophysiological Activity is Slowed by Concussion*

3 We first examined the effect of concussion on changes in aperiodic neurophysiological activity  
4 from pre-to-post-season. The aperiodic exponent (region-wise  $p_{\text{FDR}}$ 's < .05; region-average effect:  
5  $p < .001$ ,  $t = 4.80$ ; Figure 2) and offset (region-wise  $p_{\text{FDR}}$ 's < .05; region-average effect:  $p < .001$ ,  
6  $t = 5.04$ ; Figure S1) were both increased from pre- to post-season in individuals who experienced  
7 a concussion, relative to those who did not. Frequency spectra averaged over a representative  
8 concussion-sensitive brain region (left caudal middle frontal) are shown in Figure S2 for the pre-  
9 and post-season timepoints for concussed and non-concussed individuals. These relationships  
10 remained intact when outliers were excluded (see *Methods: Statistics*), as did the effect on the  
11 aperiodic exponent when it was parameterized only using high-frequency neurophysiological  
12 activity (10 – 40 Hz; region-wise  $p_{\text{FDR}}$ 's < .05; Figure S3). Pre-to-post-season changes in each  
13 neurophysiological feature for concussed and non-concussed participants can be seen in Figure  
14 S4.

15

1

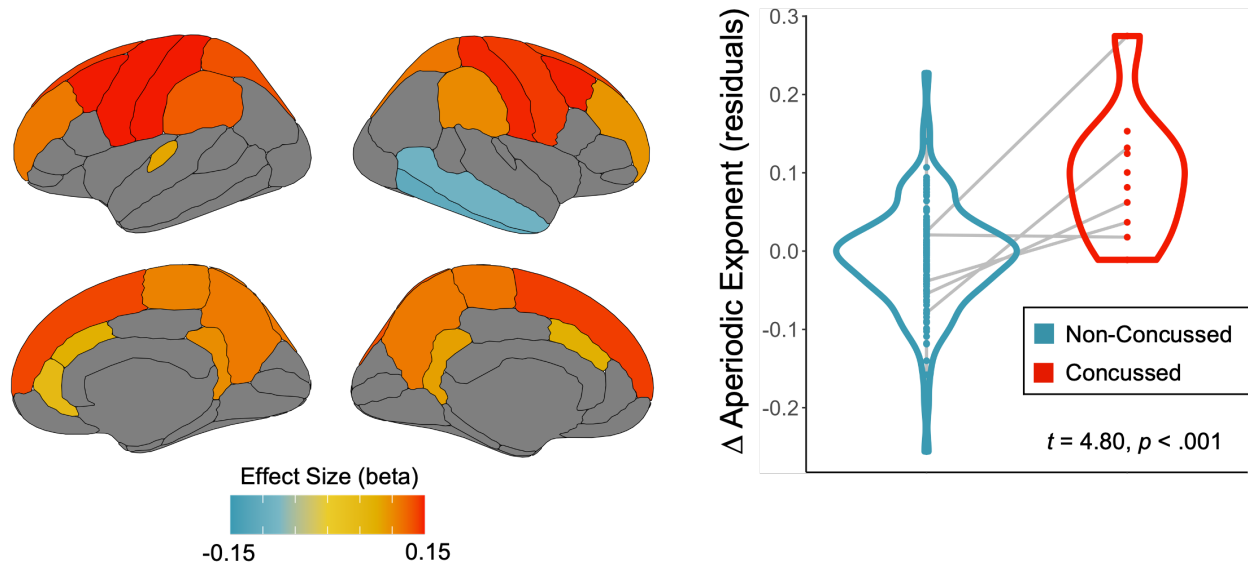

**Figure 2. Concussion increases the aperiodic exponent in superior frontal cortices.** Concussion effects on the post-minus-pre-season change in aperiodic exponent are displayed on the left as beta weight maps, thresholded based on a cutoff of  $p_{FDR} < .05$ . The violin plot to the right demonstrates the nature of this effect from values averaged over the warm-colored regions on the left, with the post-minus-pre-season change in aperiodic exponent (residuals) for concussed seasons in red and non-concussed seasons in blue.

2

3

#### 4 *Aperiodic Slope Contributes Significantly to Delta and Gamma Power Abnormalities in* 5 *Concussion*

6 We replicated previously reported increases and decreases in raw delta and gamma power  
7 respectively in concussed participants (region-wise  $p_{FDR}$ 's  $< .05$ ; Figure 3), and the spatial  
8 topography of this effect qualitatively mirrored the concussion-related slowing of aperiodic  
9 neurophysiological activity. However, once we corrected the delta band values for the aperiodic  
10 features, we observed no such effect (all region-wise  $p_{FDR}$ 's  $> .309$ ; Figure 3). Note that similar  
11 correction for the aperiodic component in the gamma band was not possible, due to issues with  
12 fitting  $1/f$  models at frequencies above  $\sim 40$  Hz.<sup>29</sup> We also found that the observed change in the  
13 aperiodic exponent accounted for the effect of concussion on both delta and gamma power using

1 causal mediation analysis. There was an indirect effect of the aperiodic exponent on both the  
 2 concussion-raw delta relationship (ACME = .020,  $p < .001$ ; Figure 3) and the concussion-raw  
 3 gamma relationship (ACME = -.002,  $p < .001$ ; Figure 3).

4

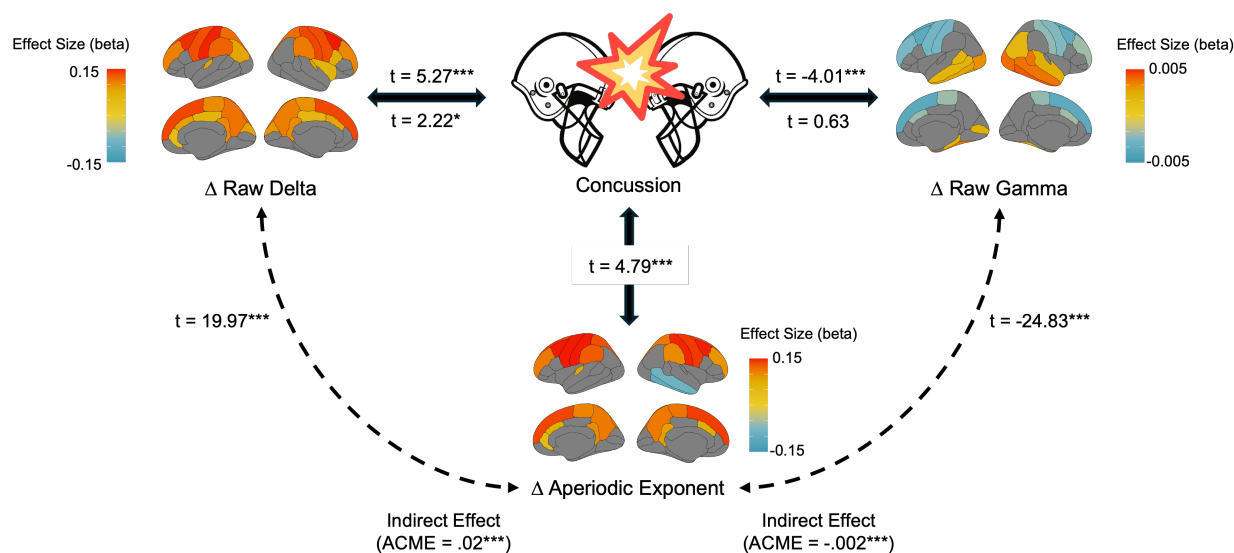

**Figure 3. Aperiodic slowing accounts for the effect of concussion on raw delta and gamma power.** Causal mediation analysis: regression paths are shown between concussion (top middle), post-minus-pre-season change in aperiodic exponent (bottom; averaged over significant regions from the linear-mixed model analysis in Figure 2), raw delta band power (top left; averaged over the same regions from Figure 2), and raw gamma band power (top right; averaged over the same regions from Figure 2). The t-values next to each line correspond to their linear relationship modeled via multiple regression (accounting for nuisance covariates). The t-values above the top left and right arrows represent the relationships between concussion and changes in raw delta and gamma activity, respectively, without accounting for changes in the aperiodic exponent. The t-values below the top left and right arrows indicate the same relationships once change in the aperiodic exponent was included in the model. The t-values outside the dotted lines represent the relationships between post-minus-pre-season changes in aperiodic exponent and changes in raw delta and gamma power. The average causal mediation effects (ACME; below) indicated significant mediation by the aperiodic exponent for both the concussion-delta and concussion-gamma relationship. \* $p < 0.05$ , \*\*\* $p < 0.001$ .

5

## 6 *Periodic Alpha and Theta Activity is Reduced by Concussion*

7 We also examined whether aperiodic-corrected neurophysiological activity was related to the  
 8 occurrence of concussion. Aperiodic-corrected alpha (region-wise  $p_{FDR}$ 's  $< .05$ ; region-average  
 9 effect:  $p < .001$ ,  $t = -4.57$ ; Figure 4) and theta (region-wise  $p_{FDR}$ 's  $< .05$ ; region-average effect:  $p$

1 < .001,  $t = -4.17$ ; Figure S5) activity were both decreased from pre- to post-season in individuals  
2 who experienced a concussion, relative to those who did not. These relationships remained intact  
3 when outliers were excluded (see *Methods: Statistics*). No significant effects were seen in the  
4 aperiodic-corrected delta and beta bands.

5

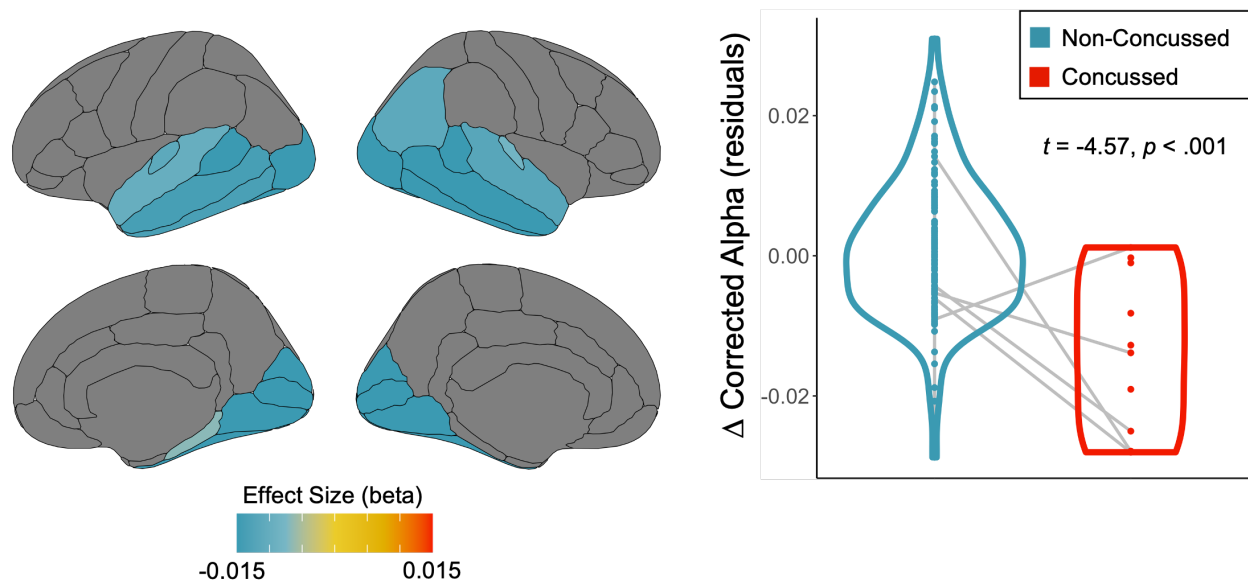

**Figure 4. Concussion decreases aperiodic-corrected alpha oscillations in temporo-occipital cortices.** Concussion effects on the post-minus-pre-season change in aperiodic corrected alpha band are displayed on the left as beta weight maps, thresholded based on a cutoff of  $p_{FDR} < .05$ . The violin plot to the right demonstrates the nature of this effect from values averaged over the filled regions on the left, with the post-minus-pre-season change in aperiodic exponent (residuals) for concussed seasons in red and non-concussed seasons in blue.

6

### 7 *Concussion-related Aperiodic Slowing is Associated with Severity of Cognitive Symptoms*

8 Finally, to determine the clinical relevance of the observed concussion-related changes in the  
9 aperiodic exponent, we related PCSI cognitive symptom scores to changes in the pre-to-post-  
10 season exponents that we averaged over the concussion-sensitive regions indicated by warm  
11 colors in Figure 2. There was a significant positive correlation between the PCSI cognitive domain  
12 scores and pre-to-post-season exponent changes ( $r = .85$ ,  $p = .008$ ;  $N = 8$ ; Figure 5), such that

1 greater concussion-related aperiodic slowing was associated with higher reported cognitive  
2 symptoms at the time of assessment. To partially address the limitations of the small sample size,  
3 we re-computed this relationship using nonparametric permutation testing and findings remained  
4 significant (10,000 permutations;  $p_{\text{PERM}} = .012$ ).

5

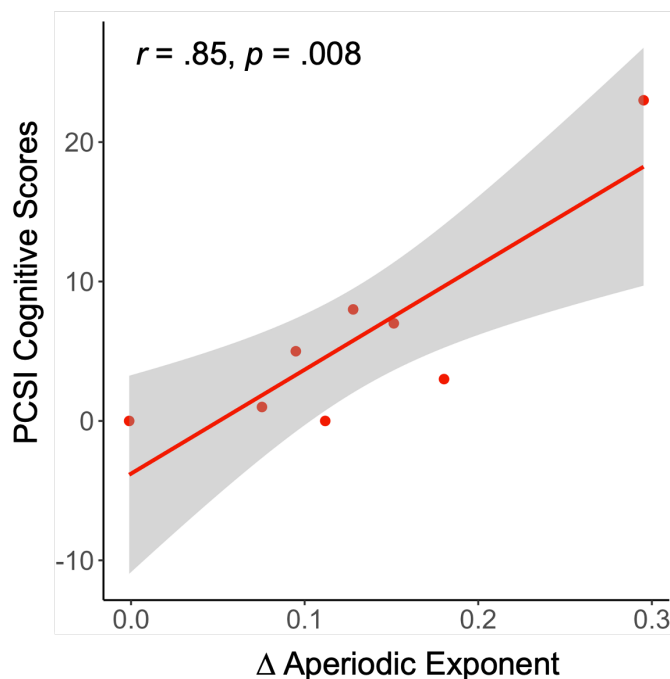

**Figure 5. Concussion-related changes in aperiodic exponent are associated with the severity of cognitive symptoms.** Post-minus-pre-season changes in the aperiodic exponent were averaged over the warm-colored concussion-sensitive brain regions indicated in Figure 2 and are plotted (x-axis) against the cognitive symptom scores from the Post-Concussion Symptom Inventory (PCSI; y-axis). The line-of-best fit and associated statistics are overlaid, and the shaded area indicates the 95% confidence interval. Note that of the 10 participants with complete MEG data who experienced a concussion, only  $N = 8$  also had PCSI scores available for this analysis.

6

7

8

9

10



## 1 Discussion

2 Alterations in neurophysiological activity have been previously documented in adults with mTBI<sup>13</sup>  
3 and to a lesser degree, in pediatric populations<sup>5</sup>; however, these investigations have primarily  
4 focused on periodic (i.e., rhythmic) brain activity. Whether the emerging physiologic importance  
5 of the aperiodic component of neurophysiological activity is related to concussion in the  
6 adolescent brain, and whether any such changes are clinically meaningful, are questions that  
7 have yet to be answered. Using resting-state MEG, we demonstrate aperiodic neurophysiologic  
8 slowing after concussion in youth tackle football players, indicating reductions in cortical  
9 excitability, with association to cognitive symptoms.

10 With these same data, and in agreement with several reports<sup>10,66–70</sup>, Davenport et al. previously  
11 showed that whole-brain delta power was significantly increased in high school American football  
12 players after a concussion was diagnosed during the season.<sup>5</sup> We reaffirm this finding with  
13 enhanced spatial specificity: activity in the delta frequency band, when uncorrected for aperiodic  
14 activity, is increased from pre- to post-season in adolescents who experienced concussion in this  
15 participant sample. We also extend our analyses to the gamma band and find a significant  
16 decrease in gamma activity after concussion, which again aligns with previous research.<sup>13,71</sup>

17 Intriguingly, we then showed that the aperiodic exponent increased from pre- to post-season in  
18 tackle football players with diagnosed concussion, relative to players without such a diagnosis,  
19 indicating a relative decrease in cortical excitability. This aligns with previous research indicating  
20 cortical hypoexcitability and increased inhibition following concussion<sup>72,73</sup>. The spatial topography  
21 of this concussion effect is similar to those of raw delta and gamma activity, indicating that it may  
22 be responsible for the effects seen in these canonical frequency bands. Supporting this concept,  
23 we find that correction of delta band values for aperiodic activity results in no observed  
24 concussion-related effects in this band. Additionally, a causal mediation analysis indicated that

1 the concussion-raw delta and concussion-raw gamma relationships could both be explained by  
2 changes in the aperiodic exponent. Using the parental PCSI, which has high test-retest reliability  
3 and developmentally appropriate utility in studying concussion-related symptomatology,<sup>58</sup> we also  
4 show that the magnitude of concussion-related decreases in cortical excitability are associated  
5 with higher parent report of cognitive symptoms in concussed adolescents, indicating potential for  
6 the use of aperiodic features as clinical markers.

7 We also observe significant pre- to post-season decreases in both alpha and theta periodic  
8 activity in posterior cortical regions, which replicate and add to existing literature indicating  
9 rhythmic changes in the context of mTBI.<sup>14,25</sup> We did not observe the decrease in beta band  
10 activity that has previously been reported in adults with mTBI, and future research should  
11 investigate potential developmental changes in the spectral definitions of periodic effects of mTBI.

12 Our results are notably limited by a relatively small sample of individuals who experienced a  
13 concussion during a season of youth football, due to the inherent difficulties of collecting this type  
14 of multi-timepoint data. However, this repeated measures approach (i.e., both from pre-to-post  
15 season and across seasons within an individual) partially ameliorates this concern by reducing  
16 unrelated variance in our signals of interest, and our linear mixed-effects statistical approach fully  
17 leverages the nested nature of these data. The inclusion of only male participants is also a  
18 limitation and should be addressed via similar studies in female and mixed-sex impact sports. The  
19 subjectivity regarding the clinical diagnosis of concussion is also important to consider in this  
20 study; however, several factors were employed to mitigate this limitation. Not only were parents,  
21 coaches, and players educated before each season on the signs and symptoms of concussion,  
22 but an experienced certified athletic trainer was also present at all practices and games to help  
23 identify these signs and assess for concussion. Furthermore, a board-certified sports medicine  
24 physician evaluated all suspected concussions at our collaborating concussion clinic within 24-72  
25 hours of injury to confirm the diagnosis.

1 Overall, our findings suggest that previous electrophysiological neuroimaging findings in mTBI  
2 could be, at least partially, explained by a more parsimonious slowing of aperiodic  
3 neurophysiological activity, which is also associated with symptom severity. Our results in parallel  
4 demonstrate the utility of parameterizing the neurophysiological signal to enhance mechanistic  
5 interpretation and statistical sensitivity.

## 1 **Acknowledgments**

2 This work was supported by the National Institutes of Health (NIH) grants R01NS082453 and  
3 R01NS091602 to CTW; a Banting Postdoctoral Fellowship (BPF-186555) and the Canada  
4 Research Chair (CRC-2023-00300) in Neurophysiology of Aging and Neurodegeneration from  
5 the Canadian Institutes of Health Research (CIHR) and NIH grant F32-NS119375 to AIW.  
6 Additionally, special thanks to Wake Forest School of Medicine and the Childress Institute for  
7 Pediatric Trauma at Wake Forest Baptist Medical Center for the support provided during the  
8 study.

## References

1. Daneshvar DH, Nowinski CJ, McKee AC, Cantu RC. The epidemiology of sport-related concussion. *Clin Sports Med*. 2011;30(1):1-17, vii. doi:10.1016/j.csm.2010.08.006
2. Kelley ME, Urban JE, Miller LE, et al. Head Impact Exposure in Youth Football: Comparing Age- and Weight-Based Levels of Play. *J Neurotrauma*. 2017;34(11):1939-1947. doi:10.1089/neu.2016.4812
3. Ling H, Hardy J, Zetterberg H. Neurological consequences of traumatic brain injuries in sports. *Mol Cell Neurosci*. 2015;66(Pt B):114-122. doi:10.1016/j.mcn.2015.03.012
4. Mez J, Daneshvar DH, Abdolmohammadi B, et al. Duration of American Football Play and Chronic Traumatic Encephalopathy. *Ann Neurol*. 2020;87(1):116-131. doi:10.1002/ana.25611
5. Davenport EM, Urban JE, Vaughan C, et al. MEG measured delta waves increase in adolescents after concussion. *Brain Behav*. 2022;12(9):e2720. doi:10.1002/brb3.2720
6. Alhourani A, Wozny TA, Krishnaswamy D, et al. Magnetoencephalography-based identification of functional connectivity network disruption following mild traumatic brain injury. *J Neurophysiol*. 2016;116(4):1840-1847. doi:10.1152/jn.00513.2016
7. Churchill NW, Hutchison MG, Richards D, Leung G, Graham SJ, Schweizer TA. The first week after concussion: Blood flow, brain function and white matter microstructure. *Neuroimage Clin*. 2017;14:480-489. doi:10.1016/j.nicl.2017.02.015
8. Lancaster MA, Olson DV, McCrea MA, Nelson LD, LaRoche AA, Muftuler LT. Acute white matter changes following sport-related concussion: A serial diffusion tensor and diffusion kurtosis tensor imaging study. *Hum Brain Mapp*. 2016;37(11):3821-3834. doi:10.1002/hbm.23278
9. Mustafi SM, Harezlak J, Koch KM, et al. Acute White-Matter Abnormalities in Sports-Related Concussion: A Diffusion Tensor Imaging Study from the NCAA-DoD CARE Consortium. *J Neurotrauma*. 2018;35(22):2653-2664. doi:10.1089/neu.2017.5158
10. Huang MX, Nichols S, Robb A, et al. An automatic MEG low-frequency source imaging approach for detecting injuries in mild and moderate TBI patients with blast and non-blast causes. *Neuroimage*. 2012;61(4):1067-1082. doi:10.1016/j.neuroimage.2012.04.029
11. Schwartz ES, Edgar JC, Gaetz WC, Roberts TPL. Magnetoencephalography. *Pediatr Radiol*. 2010;40(1):50-58. doi:10.1007/s00247-009-1451-y
12. Baillet S. Magnetoencephalography for brain electrophysiology and imaging. *Nat Neurosci*. 2017;20(3):327-339. doi:10.1038/nn.4504
13. Huang MX, Huang CW, Harrington DL, et al. Marked Increases in Resting-State MEG Gamma-Band Activity in Combat-Related Mild Traumatic Brain Injury. *Cereb Cortex*. 2020;30(1):283-295. doi:10.1093/cercor/bhz087

- 1 14. Zhang J, Safar K, Emami Z, et al. Local and large-scale beta oscillatory dysfunction in  
2 males with mild traumatic brain injury. *Journal of Neurophysiology*. 2020;124(6):1948-1958.  
3 doi:10.1152/jn.00333.2020
- 4 15. Bosch TJ, Groth C, Singh A. Resting-State Low-Frequency Cerebellar Oscillations Can  
5 Be Abnormal in Parkinson's Disease. *Cerebellum*. 2022;21(6):1139-1143.  
6 doi:10.1007/s12311-021-01343-7
- 7 16. Zijlmans JC, Pasman JW, Horstink MW, et al. EEG findings in patients with vascular  
8 parkinsonism. *Acta Neurol Scand*. 1998;98(4):243-247. doi:10.1111/j.1600-  
9 0404.1998.tb07303.x
- 10 17. Soikkeli R, Partanen J, Soininen H, Pääkkönen A, Riekkinen P. Slowing of EEG in  
11 Parkinson's disease. *Electroencephalogr Clin Neurophysiol*. 1991;79(3):159-165.  
12 doi:10.1016/0013-4694(91)90134-p
- 13 18. Wiesman AI, da Silva Castanheira J, Degroot C, et al. Adverse and compensatory  
14 neurophysiological slowing in Parkinson's disease. *Prog Neurobiol*. 2023;231:102538.  
15 doi:10.1016/j.pneurobio.2023.102538
- 16 19. Crowley K, Sullivan EV, Adalsteinsson E, Pfefferbaum A, Colrain IM. Differentiating  
17 pathologic delta from healthy physiologic delta in patients with Alzheimer disease. *Sleep*.  
18 2005;28(7):865-870. doi:10.1093/sleep/28.7.865
- 19 20. Valladares-Neto DC, Buchsbaum MS, Evans WJ, et al. EEG delta, positron emission  
20 tomography, and memory deficit in Alzheimer's disease. *Neuropsychobiology*.  
21 1995;31(4):173-181. doi:10.1159/000119189
- 22 21. Wiesman AI, Murman DL, Losh RA, et al. Spatially resolved neural slowing predicts  
23 impairment and amyloid burden in Alzheimer's disease. *Brain*. 2022;145(6):2177-2189.  
24 doi:10.1093/brain/awab430
- 25 22. Wiesman AI, Murman DL, May PE, et al. Spatio-spectral relationships between  
26 pathological neural dynamics and cognitive impairment along the Alzheimer's disease  
27 spectrum. *Alzheimers Dement (Amst)*. 2021;13(1):e12200. doi:10.1002/dad2.12200
- 28 23. Ranasinghe KG, Cha J, Iaccarino L, et al. Neurophysiological signatures in Alzheimer's  
29 disease are distinctly associated with TAU, amyloid- $\beta$  accumulation, and cognitive decline.  
30 *Sci Transl Med*. 2020;12(534):eaaz4069. doi:10.1126/scitranslmed.aaz4069
- 31 24. Wiesman AI, Gallego-Rudolf J, Villeneuve S, Baillet S, Wilson TW, the PARG.  
32 Neurochemical organization of cortical proteinopathy and neurophysiology along the  
33 Alzheimer's disease continuum. *Alzheimer's & Dementia*. 2024;n/a(n/a).  
34 doi:10.1002/alz.14110
- 35 25. Nwakamma MC, Stillman AM, Gabard-Durnam LJ, Cavanagh JF, Hillman CH, Morris  
36 TP. Slowing of Parameterized Resting-State Electroencephalography After Mild Traumatic  
37 Brain Injury. *Neurotrauma Reports*. 2024;5(1):448-461. doi:10.1089/neur.2024.0004
- 38 26. Inferring Synaptic Excitation/Inhibition Balance from Field Potentials | bioRxiv. Accessed  
39 April 16, 2024. <https://www.biorxiv.org/content/10.1101/081125v2>

- 1 27. Lendner JD, Helfrich RF, Mander BA, et al. An electrophysiological marker of arousal  
2 level in humans. Haegens S, Colgin LL, Piantoni G, eds. *eLife*. 2020;9:e55092.  
3 doi:10.7554/eLife.55092
- 4 28. Gerster M, Waterstraat G, Litvak V, et al. Separating Neural Oscillations from Aperiodic  
5 1/f Activity: Challenges and Recommendations. *Neuroinformatics*. 2022;20(4):991-1012.  
6 doi:10.1007/s12021-022-09581-8
- 7 29. Donoghue T, Haller M, Peterson EJ, et al. Parameterizing neural power spectra into  
8 periodic and aperiodic components. *Nat Neurosci*. 2020;23(12):1655-1665.  
9 doi:10.1038/s41593-020-00744-x
- 10 30. Wen H, Liu Z. Separating Fractal and Oscillatory Components in the Power Spectrum of  
11 Neurophysiological Signal. *Brain Topogr*. 2016;29(1):13-26. doi:10.1007/s10548-015-0448-0
- 12 31. He BJ. Scale-free brain activity: past, present, and future. *Trends Cogn Sci*.  
13 2014;18(9):480-487. doi:10.1016/j.tics.2014.04.003
- 14 32. Wen H, Liu Z. Broadband Electrophysiological Dynamics Contribute to Global Resting-  
15 State fMRI Signal. *J Neurosci*. 2016;36(22):6030-6040. doi:10.1523/JNEUROSCI.0187-  
16 16.2016
- 17 33. Voytek B, Kramer MA, Case J, et al. Age-Related Changes in 1/f Neural  
18 Electrophysiological Noise. *J Neurosci*. 2015;35(38):13257-13265.  
19 doi:10.1523/JNEUROSCI.2332-14.2015
- 20 34. The neurophysiological brain-fingerprint of Parkinson's disease - PubMed. Accessed  
21 April 23, 2024. <https://pubmed.ncbi.nlm.nih.gov/36798232/>
- 22 35. Johnston PR, McIntosh AR, Meltzer JA. Spectral slowing in chronic stroke reflects  
23 abnormalities in both periodic and aperiodic neural dynamics. *Neuroimage Clin*.  
24 2023;37:103277. doi:10.1016/j.nicl.2022.103277
- 25 36. Wiesman AI, Donhauser PW, Degroot C, et al. Aberrant neurophysiological signaling  
26 associated with speech impairments in Parkinson's disease. *NPJ Parkinsons Dis*.  
27 2023;9(1):61. doi:10.1038/s41531-023-00495-z
- 28 37. Hill AT, Clark GM, Bigelow FJ, Lum JAG, Enticott PG. Periodic and aperiodic neural  
29 activity displays age-dependent changes across early-to-middle childhood. *Dev Cogn*  
30 *Neurosci*. 2022;54:101076. doi:10.1016/j.dcn.2022.101076
- 31 38. Favaro J, Colombo MA, Mikulan E, et al. The maturation of aperiodic EEG activity  
32 across development reveals a progressive differentiation of wakefulness from sleep.  
33 *Neuroimage*. 2023;277:120264. doi:10.1016/j.neuroimage.2023.120264
- 34 39. Ossandón JP, Stange L, Gudi-Mindermann H, et al. The development of oscillatory and  
35 aperiodic resting state activity is linked to a sensitive period in humans. *Neuroimage*.  
36 2023;275:120171. doi:10.1016/j.neuroimage.2023.120171

- 1 40. Ostlund B, Donoghue T, Anaya B, et al. Spectral parameterization for studying  
2 neurodevelopment: How and why. *Developmental Cognitive Neuroscience*. 2022;54:101073.  
3 doi:10.1016/j.dcn.2022.101073
- 4 41. Helson P, Lundqvist D, Svenningsson P, Vinding MC, Kumar A. Cortex-wide topography  
5 of 1/f-exponent in Parkinson's disease. *npj Parkinsons Dis*. 2023;9(1):1-11.  
6 doi:10.1038/s41531-023-00553-6
- 7 42. Wiest C, Torrecillos F, Pogosyan A, et al. The aperiodic exponent of subthalamic field  
8 potentials reflects excitation/inhibition balance in Parkinsonism. Swann NC, de Lange FP,  
9 Voytek B, eds. *eLife*. 2023;12:e82467. doi:10.7554/eLife.82467
- 10 43. van Heumen S, Moreau JT, Simard-Tremblay E, Albrecht S, Dudley RW, Baillet S. Case  
11 Report: Aperiodic Fluctuations of Neural Activity in the Ictal MEG of a Child With Drug-  
12 Resistant Fronto-Temporal Epilepsy. *Front Hum Neurosci*. 2021;15.  
13 doi:10.3389/fnhum.2021.646426
- 14 44. Charlebois CM, Anderson DN, Smith EH, et al. Circadian changes in aperiodic activity  
15 are correlated with seizure reduction in patients with mesial temporal lobe epilepsy treated  
16 with responsive neurostimulation. *Epilepsia*. Published online March 22, 2024.  
17 doi:10.1111/epi.17938
- 18 45. Donoghue T, Dominguez J, Voytek B. Electrophysiological Frequency Band Ratio  
19 Measures Conflate Periodic and Aperiodic Neural Activity. *eNeuro*.  
20 2020;7(6):ENEURO.0192-20.2020. doi:10.1523/ENEURO.0192-20.2020
- 21 46. Kopf M, Martini J, Stier C, et al. Aperiodic activity indexes neural hyperexcitability in  
22 generalized epilepsy. *eNeuro*. Published online August 13, 2024:ENEURO.0242-24.2024.  
23 doi:10.1523/ENEURO.0242-24.2024
- 24 47. Gao R, Peterson EJ, Voytek B. Inferring synaptic excitation/inhibition balance from field  
25 potentials. *Neuroimage*. 2017;158:70-78. doi:10.1016/j.neuroimage.2017.06.078
- 26 48. Spear LP. Adolescent neurodevelopment. *J Adolesc Health*. 2013;52(2 Suppl 2):S7-13.  
27 doi:10.1016/j.jadohealth.2012.05.006
- 28 49. Choe MC. The Pathophysiology of Concussion. *Curr Pain Headache Rep*.  
29 2016;20(6):42. doi:10.1007/s11916-016-0573-9
- 30 50. Sharp DJ, Scott G, Leech R. Network dysfunction after traumatic brain injury. *Nat Rev*  
31 *Neurol*. 2014;10(3):156-166. doi:10.1038/nrneurol.2014.15
- 32 51. Davenport EM, Whitlow CT, Urban JE, et al. Abnormal white matter integrity related to  
33 head impact exposure in a season of high school varsity football. *J Neurotrauma*.  
34 2014;31(19):1617-1624. doi:10.1089/neu.2013.3233
- 35 52. Gioia, Janusz, Vaughan, Sady. Post-Concussion Symptom Inventory Ages 13-18 (PCSI-  
36 SR13) Pre/Post Version. Published online 2014 2011. [https://childrensnational.org/-/media/cnhs-site/files/departments/score/pcsi-self-13-18-pre-post-](https://childrensnational.org/-/media/cnhs-site/files/departments/score/pcsi-self-13-18-pre-post-injury.pdf?la=en&hash=FC602D00DB8BFB71FD9D78899BF84E5DED346202)  
37 [injury.pdf?la=en&hash=FC602D00DB8BFB71FD9D78899BF84E5DED346202](https://childrensnational.org/-/media/cnhs-site/files/departments/score/pcsi-self-13-18-pre-post-injury.pdf?la=en&hash=FC602D00DB8BFB71FD9D78899BF84E5DED346202)  
38



- 1 53. Fischl B. FreeSurfer. *Neuroimage*. 2012;62(2):774-781.  
2 doi:10.1016/j.neuroimage.2012.01.021
- 3 54. Wiesman AI, da Silva Castanheira J, Baillet S. Stability of spectral estimates in resting-  
4 state magnetoencephalography: Recommendations for minimal data duration with  
5 neuroanatomical specificity. *Neuroimage*. 2022;247:118823.  
6 doi:10.1016/j.neuroimage.2021.118823
- 7 55. Tadel F, Baillet S, Mosher JC, Pantazis D, Leahy RM. Brainstorm: a user-friendly  
8 application for MEG/EEG analysis. *Comput Intell Neurosci*. 2011;2011:879716.  
9 doi:10.1155/2011/879716
- 10 56. Tadel F, Bock E, Niso G, et al. MEG/EEG Group Analysis With Brainstorm. *Front*  
11 *Neurosci*. 2019;13:76. doi:10.3389/fnins.2019.00076
- 12 57. Desikan RS, Ségonne F, Fischl B, et al. An automated labeling system for subdividing  
13 the human cerebral cortex on MRI scans into gyral based regions of interest. *Neuroimage*.  
14 2006;31(3):968-980. doi:10.1016/j.neuroimage.2006.01.021
- 15 58. Sady MD, Vaughan CG, Gioia GA. Psychometric Characteristics of the Postconcussion  
16 Symptom Inventory in Children and Adolescents. *Arch Clin Neuropsychol*. 2014;29(4):348-  
17 363. doi:10.1093/arclin/acu014
- 18 59. Bates D, Mächler M, Bolker B, Walker S. Fitting Linear Mixed-Effects Models using  
19 lme4. Published online June 23, 2014. doi:10.48550/arXiv.1406.5823
- 20 60. Controlling the False Discovery Rate: A Practical and Powerful Approach to Multiple  
21 Testing - Benjamini - 1995 - Journal of the Royal Statistical Society: Series B  
22 (Methodological) - Wiley Online Library. Accessed February 15, 2024.  
23 <https://rss.onlinelibrary.wiley.com/doi/10.1111/j.2517-6161.1995.tb02031.x>
- 24 61. Dunkley BT, Da Costa L, Bethune A, et al. Low-frequency connectivity is associated with  
25 mild traumatic brain injury. *Neuroimage Clin*. 2015;7:611-621. doi:10.1016/j.nicl.2015.02.020
- 26 62. Korn A, Golan H, Melamed I, Pascual-Marqui R, Friedman A. Focal cortical dysfunction  
27 and blood-brain barrier disruption in patients with Postconcussion syndrome. *J Clin*  
28 *Neurophysiol*. 2005;22(1):1-9. doi:10.1097/01.wnp.0000150973.24324.a7
- 29 63. Munia TTK, Haider A, Fazel-Rezai R. Evidence of brain functional deficits following  
30 sport-related mild traumatic brain injury. *Annu Int Conf IEEE Eng Med Biol Soc*.  
31 2017;2017:3212-3215. doi:10.1109/EMBC.2017.8037540
- 32 64. Reddy DD, Davenport EM, Yu FF, et al. Alterations in the Magnetoencephalography  
33 Default Mode Effective Connectivity following Concussion. *AJNR Am J Neuroradiol*.  
34 2021;42(10):1776-1782. doi:10.3174/ajnr.A7232
- 35 65. Tingley D, Yamamoto T, Hirose K, Keele L, Imai K. **mediation** : R Package for Causal  
36 Mediation Analysis. *J Stat Soft*. 2014;59(5). doi:10.18637/jss.v059.i05
- 37 66. Huang M, Risling M, Baker DG. The role of biomarkers and MEG-based imaging  
38 markers in the diagnosis of post-traumatic stress disorder and blast-induced mild traumatic

- 1 brain injury. *Psychoneuroendocrinology*. 2016;63:398-409.  
2 doi:10.1016/j.psyneuen.2015.02.008
- 3 67. Huang MX, Nichols S, Baker DG, et al. Single-subject-based whole-brain MEG slow-  
4 wave imaging approach for detecting abnormality in patients with mild traumatic brain injury.  
5 *Neuroimage Clin*. 2014;5:109-119. doi:10.1016/j.nicl.2014.06.004
- 6 68. Huang MX, Theilmann RJ, Robb A, et al. Integrated imaging approach with MEG and  
7 DTI to detect mild traumatic brain injury in military and civilian patients. *J Neurotrauma*.  
8 2009;26(8):1213-1226. doi:10.1089/neu.2008.0672
- 9 69. Lewine JD, Davis JT, Sloan JH, Kodituwakku PW, Orrison WW. Neuromagnetic  
10 assessment of pathophysiologic brain activity induced by minor head trauma. *AJNR Am J*  
11 *Neuroradiol*. 1999;20(5):857-866.
- 12 70. Lewine JD, Davis JT, Bigler ED, et al. Objective documentation of traumatic brain injury  
13 subsequent to mild head trauma: multimodal brain imaging with MEG, SPECT, and MRI. *J*  
14 *Head Trauma Rehabil*. 2007;22(3):141-155. doi:10.1097/01.HTR.0000271115.29954.27
- 15 71. Huang MX, Robb Swan A, Angeles Quinto A, et al. Resting-State  
16 Magnetoencephalography Source Imaging Pilot Study in Children with Mild Traumatic Brain  
17 Injury. *J Neurotrauma*. 2020;37(7):994-1001. doi:10.1089/neu.2019.6417
- 18 72. Scott E, Kidgell DJ, Frazer AK, Pearce AJ. The Neurophysiological Responses of  
19 Concussive Impacts: A Systematic Review and Meta-Analysis of Transcranial Magnetic  
20 Stimulation Studies. *Front Hum Neurosci*. 2020;14:306. doi:10.3389/fnhum.2020.00306
- 21 73. Powers KC, Cinelli ME, Kalmar JM. Cortical hypoexcitability persists beyond the  
22 symptomatic phase of a concussion. *Brain Inj*. 2014;28(4):465-471.  
23 doi:10.3109/02699052.2014.888759

## 1 Tables

|                              | <b>Concussion (N = 10)</b> | <b>Without Concussion (N = 81)</b> |
|------------------------------|----------------------------|------------------------------------|
| <b>Demographics</b>          |                            |                                    |
| Age (years)                  | 15.99±.85                  | 16.13±1.19                         |
| BMI                          | 25.87±6.69                 | 26.75±5.41                         |
| Education completed (years)  | 9.22±.83                   | 9.57±1.09                          |
| Time Between Scans (days)    | 143.2±23.33                | 159.04±49.63                       |
| Handedness (% Right Handed)* | 9(100)                     | 54(87)                             |
| <b>Race or ethnicity</b>     |                            |                                    |
| Native American              | 0                          | 3(3.7)                             |
| Asian                        | 0                          | 1(1.23)                            |
| Pacific Islander             | 0                          | 1(1.23)                            |
| Black                        | 5(50)                      | 33(40.74)                          |
| White                        | 5(50)                      | 44(54.32)                          |
| Hispanic                     | 0                          | 1(1.23)                            |
| Non-Hispanic                 | 8(80)                      | 43(53.09)                          |

2  
3 Values for continuous measures are means±1 standard deviation.  
4 Categorical variables are shown as numbers of participants where data was available, with percentages in parentheses.  
5 \*Handedness data was only provided by nine of the concussed participants and 62 of 81 football players without concussion.

## 6 Table 1. Clinical Characteristics of Participants
